# Supplementary material for: Hippocampal transcriptome-wide association study and neurobiological pathway analysis for Alzheimer’s disease
Source: PubMed Central journal article supplement (PMC7906391; doi:10.1371/journal.pgen.1009363), 2021-02-25

# AD TWAS Nucleus accumbens

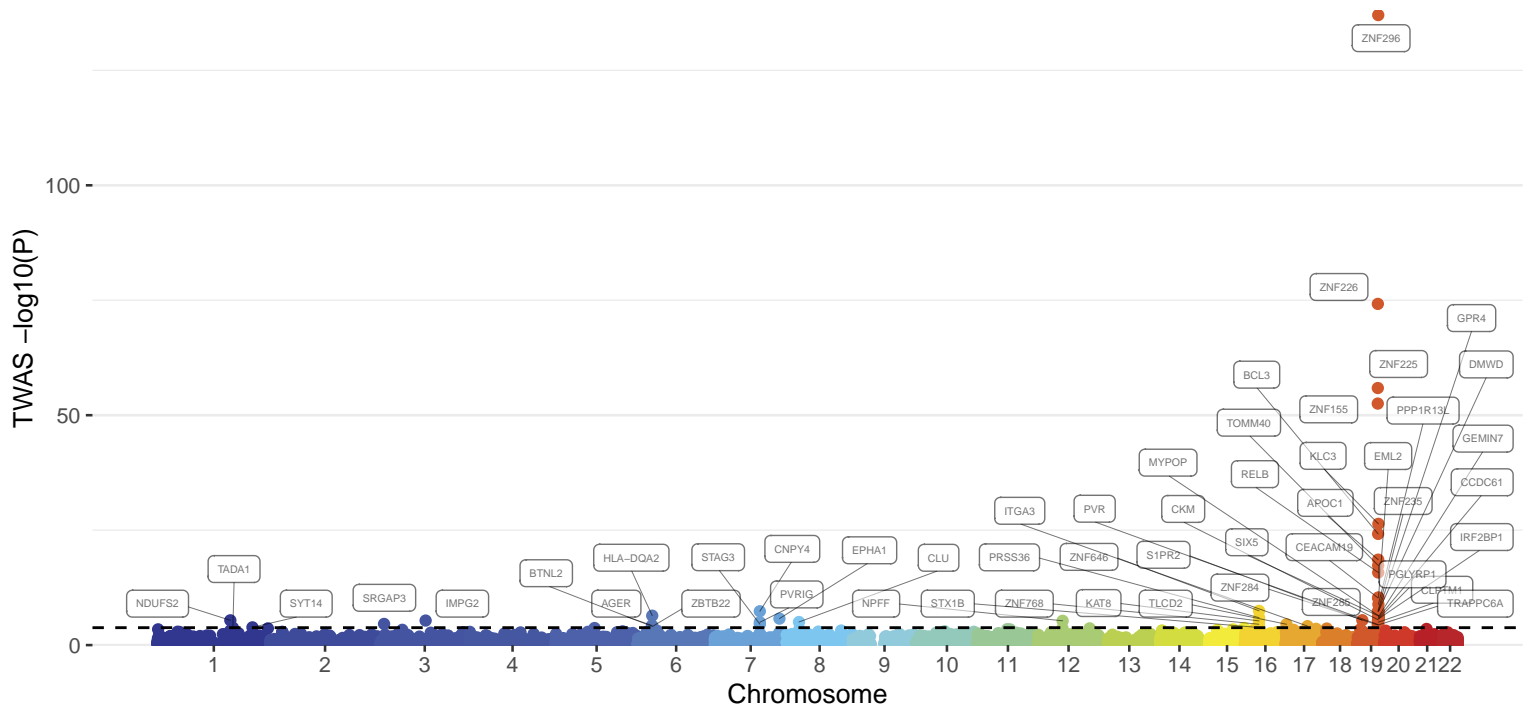

Supplement: pgen.1009363.s021.pdf [file pgen.1009363.s021.pdf]
