# Supplementary material for: Hippocampal transcriptome-wide association study and neurobiological pathway analysis for Alzheimer’s disease
Source: PLoS Genet. 2021 Feb 25;17(2):e1009363. doi: 10.1371/journal.pgen.1009363 (PMC7906391; doi:10.1371/journal.pgen.1009363)
Supplement: S1 Table — (XLSX) [file pgen.1009363.s001.xlsx]

## Sheet: Results of TWAS and FOCUS
Hippocampal tissue prediction models				TWAS result in discovery stage			TWAS result in validation stage			FOCUS
Gene	chr	pred_perf_r2	pred_perf_pval	TWAS_zscore	TWAS_pvalue	FDR pvalue	TWAS_zscore	TWAS_pvalue	FDR pvalue	FOCUS_pip	In 90% cred_set	region
QPCTL	19	0.58354	2.21e-23	-23.3319	2.1e-120	3.16e-116	-20.0316	2.92e-89	4.38e-85	0.000624	1	19:46102697-19:47150082
DMPK	19	0.703396	4.17e-33	-22.6716	8.54e-114	6.41e-110	-19.7409	9.61e-87	7.21e-83	0.0337	1	19:46102697-19:47150082
ZNF285	19	0.689577	3.19e-34	-17.9383	5.92e-72	2.96e-68	-19.2184	2.59e-82	1.3e-78	7.7e-127	0	19:44744147-19:46102697
ERCC2	19	0.699457	2.75e-33	17.8704	2.01e-71	7.53e-68	12.6317	1.41e-36	4.24e-33	0.000492	1	19:46102697-19:47150082
ZNF284	19	0.550381	2.41e-21	-17.7236	2.76e-70	8.27e-67	3.85018	0.000118029	0.0441375	1	1	19:44744147-19:46102697
CD3EAP	19	0.854508	3.1e-59	14.9158	2.6e-50	6.51e-47	14.6952	6.92e-49	2.6e-45	0.00895	1	19:46102697-19:47150082
APOE	19	0.704209	5.04e-33	-12.9012	4.43e-38	9.5e-35	-7.24913	4.19e-13	5.72e-10	1	1	19:44744147-19:46102697
CLPTM1	19	0.852859	9.97e-60	-12.0944	1.13e-33	2.12e-30	-12.0031	3.42e-33	8.56e-30	0.00901	1	19:46102697-19:47150082
EML2	19	0.759155	1.77e-41	-10.5054	8.16e-26	1.36e-22	-0.591603	0.554117	0.936238	0.00156	1	19:46102697-19:47150082
ZNF226	19	0.401009	1.14e-14	9.79139	1.23e-22	1.84e-19	4.77097	1.83e-06	0.00130965	1.54e-154	0	19:44744147-19:46102697
SIX5	19	0.524151	2.03e-21	-9.44865	3.43e-21	4.68e-18	-8.42498	3.61e-17	6.77e-14	0.000932	1	19:46102697-19:47150082
TOMM40	19	0.445271	3.54e-17	-8.39609	4.62e-17	5.77e-14	-8.55759	1.15e-17	2.47e-14	0.012	1	19:46102697-19:47150082
ZNF155	19	0.734001	1.61e-36	8.28831	1.15e-16	1.33e-13	8.33591	7.69e-17	1.15e-13	8.21e-114	0	19:44744147-19:46102697
ZNF223	19	0.613929	1.07e-27	-7.05076	1.78e-12	1.91e-09	-5.081	3.75e-07	0.00036511	1.36e-84	0	19:44744147-19:46102697
BCAM	19	0.620556	1.74e-26	6.96429	3.3e-12	3.3e-09	2.80789	0.00498678	0.352558	0.00272	1	19:46102697-19:47150082
PPP1R37	19	0.796102	1.25e-45	-6.70971	1.95e-11	1.78e-08	-5.2417	1.59e-07	0.00017679	0.00103	1	19:46102697-19:47150082
NKPD1	19	0.795013	3.75e-46	6.70447	2.02e-11	1.78e-08	4.31779	1.58e-05	0.00909281	0.000341	0	19:46102697-19:47150082
TRAPPC6A	19	0.615048	1.15e-27	6.67524	2.47e-11	2.06e-08	8.37431	5.55e-17	9.26e-14	0.000974	1	19:46102697-19:47150082
CKM	19	0.618726	7.09e-28	-6.24489	4.24e-10	3.35e-07	-4.39945	1.09e-05	0.00678324	9.83e-155	0	19:44744147-19:46102697
KAT8	16	0.336438	5.52e-11	-6.19397	5.87e-10	4.4e-07	-2.21453	0.0267922	0.573999	0.0935	1	16:29036613-16:31382470
ZNF296	19	0.810332	5.26e-49	-6.11226	9.82e-10	7.02e-07	-5.84518	5.06e-09	6.33e-06	0.000289	0	19:46102697-19:47150082
DMWD	19	0.667415	5.88e-31	-6.09412	1.1e-09	7.51e-07	-4.84612	1.26e-06	0.000944291	0.0226	1	19:46102697-19:47150082
EXOC3L2	19	0.638008	2.48e-27	-5.96253	2.48e-09	1.62e-06	-2.79916	0.00512351	0.352558	0.00065	1	19:46102697-19:47150082
PRSS36	16	0.569349	2.19e-22	-5.71943	1.07e-08	6.68e-06	-3.18077	0.00146885	0.202179	0.0155	1	16:29036613-16:31382470
CEACAM19	19	0.836752	2.43e-54	5.39759	6.75e-08	4.06e-05	3.41668	0.000633893	0.125119	0.00238	1	19:46102697-19:47150082
A2ML1	12	0.576849	3.18e-25	4.86749	1.13e-06	0.000653	1.35005	0.177	0.811568	0.000192	0	12:6419753-12:8377445
PVR	19	0.591415	1.37e-24	4.85012	1.23e-06	0.000686	4.07195	4.66e-05	0.0225598	0.0012	1	19:46102697-19:47150082
RELB	19	0.594535	3.41e-25	4.55951	5.13e-06	0.00275	2.50877	0.0121152	0.48855	0.000578	1	19:46102697-19:47150082
SGK494	17	0.394276	1.49e-13	4.48016	7.46e-06	0.00376	-0.114621	0.908746	0.98795	0.00499	0	17:21290357-17:27334244
ZNF546	19	0.651056	1.03e-29	-4.47865	7.51e-06	0.00376	-0.844225	0.398544	0.899573	0.041	1	19:40170974-19:40983323
SNRPD2	19	0.779708	7.06e-47	-4.46929	7.85e-06	0.0038	-5.07406	3.89e-07	0.00036511	0.000439	1	19:46102697-19:47150082
PVRL2	19	0.682417	5.62e-32	4.45834	8.26e-06	0.00387	3.84597	0.000120077	0.0441375	0.000528	1	19:46102697-19:47150082
ANK2	4	0.579357	4.3e-24	4.43422	9.24e-06	0.0042	2.26357	0.0236007	0.567029	0.000605	0	4:111256567-4:113869892
SERPINA12	14	0.808931	2.23e-49	4.42324	9.72e-06	0.00429	0.46318	0.643236	0.951086	0.0804	0	14:94325596-14:95750857
DACT3	19	0.607837	6.99e-26	-4.38231	1.17e-05	0.00504	-0.153446	0.878047	0.984967	0.000241	0	19:46102697-19:47150082
CD7	17	0.667766	1.35e-30	-4.34328	1.4e-05	0.00585	-0.350092	0.72627	0.963998	0.0118	1	17:80034443-17:81190053
EPHA1	7	0.609881	6.1e-26	-4.31863	1.57e-05	0.00637	-1.38654	0.165581	0.805407	0.0388	1	7:142657480-7:144968221
PBK	8	0.789365	5.65e-48	4.27213	1.94e-05	0.00765	2.54918	0.0107977	0.457561	0.00294	0	8:26682525-8:28162012
ELP3	8	0.505047	5.01e-19	4.22376	2.4e-05	0.00925	2.25774	0.0239621	0.570173	0.00724	0	8:26682525-8:28162012
ORAI3	16	0.37626	4.92e-13	-4.08285	4.45e-05	0.0167	-1.17354	0.24058	0.850563	0.000372	1	16:29036613-16:31382470
YWHAH	22	0.495537	1.63e-18	-4.03957	5.35e-05	0.0196	-0.523347	0.600733	0.939667	0.000638	1	22:31439918-22:32664612
PTPN9	15	0.38784	2.56e-14	-4.00879	6.1e-05	0.0218	-2.02952	0.0424054	0.629924	0.0153	1	15:76398987-15:78516053
HLA-DRB5	6	0.728225	1.09e-36	3.97779	6.96e-05	0.0243	2.41836	0.0155907	0.501977	0.00176	1	6:30798168-6:31570931
PPP1R13L	19	0.795994	4.89e-46	3.95117	7.78e-05	0.0265	4.26906	1.96e-05	0.0105165	0.000707	1	19:46102697-19:47150082
PCDHA4	5	0.589127	9.3e-25	3.9159	9.01e-05	0.03	3.93313	8.38e-05	0.036993	0.00672	1	5:139265602-5:140645971
GREB1	2	0.619126	1.64e-27	-3.89936	9.64e-05	0.0312	-0.207811	0.835376	0.981783	0.0339	0	2:10298469-2:12418752
CTF1	16	0.33151	8.68e-11	3.89592	9.78e-05	0.0312	0.917477	0.358893	0.896157	0.000509	1	16:29036613-16:31382470
CD34	1	0.620224	3.85e-26	3.87802	0.000105309	0.0329332	2.21291	0.0269036	0.573999	0.0202	0	1:206074070-1:208410160
SIN3A	15	0.407558	3.36e-14	-3.82803	0.000129171	0.0395712	0.0500756	0.960062	0.99513	0.000558	1	15:76398987-15:78516053
ZNF221	19	0.634141	2.27e-27	-3.81565	0.000135827	0.0407781	-2.95906	0.00308576	0.30661	0.0004	0	19:43863981-19:44743934
PPIC	5	0.507893	7.69e-20	3.80584	0.000141324	0.0415964	0.413834	0.678996	0.958697	0.00913	0	5:120452166-5:122556905
CYP51A1	7	0.488283	1.77e-19	3.77935	0.00015724	0.0453909	-0.825061	0.409337	0.902082	0.00822	0	7:90661964-7:92493332
PKP2	12	0.625151	4.12e-26	-3.76371	0.000167413	0.0474157	-1.11567	0.264565	0.857357	0.00441	0	12:30512406-12:32165416
RPL4	15	0.382893	1.84e-13	3.74843	0.000177949	0.0494664	0.401278	0.688215	0.961476	0.000427	1	15:65104668-15:67094767
