# Supplementary material for: Hippocampal transcriptome-wide association study and neurobiological pathway analysis for Alzheimer’s disease
Source: PLoS Genet. 2021 Feb 25;17(2):e1009363. doi: 10.1371/journal.pgen.1009363 (PMC7906391; doi:10.1371/journal.pgen.1009363)
Supplement: S7 Table — (XLSX) [file pgen.1009363.s007.xlsx]

## Sheet: TWAS results
Gene	Gene name	zscore	pvalue	FDR
ENSG00000104884.10	ERCC2	18.4134	1.03e-75	1.3e-71
ENSG00000131115.11	ZNF227	8.62425	6.45e-18	4.09e-14
ENSG00000104879.4	CKM	-7.78241	7.12e-15	3.01e-11
ENSG00000204920.6	ZNF155	7.77942	7.29e-15	2.31e-11
ENSG00000177045.6	SIX5	-7.29867	2.91e-13	7.37e-10
ENSG00000130204.8	TOMM40	-7.27402	3.49e-13	7.37e-10
ENSG00000179846.7	NKPD1	6.9663	3.25e-12	5.89e-09
ENSG00000170684.4	ZNF296	-6.93591	4.04e-12	6.39e-09
ENSG00000187244.6	BCAM	6.90944	4.87e-12	6.85e-09
ENSG00000130201.3	EXOC3L2	-6.88283	5.87e-12	7.44e-09
ENSG00000178386.8	ZNF223	-6.36142	2e-10	2.3e-07
ENSG00000104866.6	PPP1R37	-6.1723	6.73e-10	7.11e-07
ENSG00000007255.6	TRAPPC6A	6.15309	7.6e-10	7.41e-07
ENSG00000073008.10	PVR	5.94753	2.72e-09	2.46e-06
ENSG00000103510.15	KAT8	-5.64653	1.64e-08	1.38e-05
ENSG00000167380.12	ZNF226	5.2422	1.59e-07	0.000126
ENSG00000134014.12	ELP3	5.17298	2.3e-07	0.000172
ENSG00000185800.7	DMWD	-5.13988	2.75e-07	0.000194
ENSG00000198502.5	HLA-DRB5	5.12086	3.04e-07	0.000203
ENSG00000130202.5	PVRL2	5.10276	3.35e-07	0.000212
ENSG00000165953.5	SERPINA12	5.09123	3.56e-07	0.000215
ENSG00000178226.6	PRSS36	-4.76452	1.89e-06	0.00109
ENSG00000204967.6	PCDHA4	4.70298	2.56e-06	0.00141
ENSG00000146904.4	EPHA1	-4.67963	2.87e-06	0.00152
ENSG00000166535.15	A2ML1	4.64936	3.33e-06	0.00169
ENSG00000171202.2	TMEM126A	4.6261	3.73e-06	0.00182
ENSG00000221819.2	C16orf3	-4.57051	4.87e-06	0.00228
ENSG00000159885.9	ZNF222	-4.56	5.12e-06	0.00232
ENSG00000067191.11	CACNB1	-4.55994	5.12e-06	0.00224
ENSG00000186026.6	ZNF284	4.4795	7.48e-06	0.00316
ENSG00000001630.11	CYP51A1	4.4251	9.64e-06	0.00394
ENSG00000227507.2	LTB	4.41551	1.01e-05	0.00399
ENSG00000104853.11	CLPTM1	-4.40023	1.08e-05	0.00415
ENSG00000187187.9	ZNF546	-4.39196	1.12e-05	0.00419
ENSG00000120903.6	CHRNA2	4.32243	1.54e-05	0.00559
ENSG00000169375.11	SIN3A	-4.31775	1.58e-05	0.00555
ENSG00000156885.4	COX6A2	-4.30875	1.64e-05	0.00562
ENSG00000142273.6	CBLC	4.29533	1.74e-05	0.00582
ENSG00000150281.6	CTF1	4.20782	2.58e-05	0.00838
ENSG00000197380.6	DACT3	-4.19364	2.75e-05	0.0087
ENSG00000167524.10	SGK494	4.18165	2.89e-05	0.00895
ENSG00000232850.1	AL590708.2	4.16653	3.09e-05	0.00933
ENSG00000172164.9	SNTB1	4.15741	3.22e-05	0.00949
ENSG00000221990.2	C5orf55	4.1564	3.23e-05	0.00931
ENSG00000169410.5	PTPN9	-4.15399	3.27e-05	0.0092
ENSG00000104936.13	DMPK	-4.12738	3.67e-05	0.0101
ENSG00000022556.11	NLRP2	4.05917	4.92e-05	0.0133
ENSG00000127585.7	FBXL16	4.04315	5.27e-05	0.0139
ENSG00000140320.7	BAHD1	-4.02894	5.6e-05	0.0145
ENSG00000155111.10	CDK19	-4.02721	5.64e-05	0.0143
ENSG00000128245.10	YWHAH	-4.0219	5.77e-05	0.0143
ENSG00000168928.8	CTRB2	4.00526	6.19e-05	0.0151
ENSG00000173762.3	CD7	-3.9901	6.6e-05	0.0158
ENSG00000175592.4	FOSL1	-3.98544	6.74e-05	0.0158
ENSG00000180777.9	ANKRD30B	-3.98249	6.82e-05	0.0157
ENSG00000155530.2	LRGUK	3.97409	7.06e-05	0.016
ENSG00000221821.2	C6orf226	3.94869	7.86e-05	0.0175
ENSG00000204397.3	CARD16	3.92108	8.82e-05	0.0193
ENSG00000071539.9	TRIP13	-3.90272	9.51e-05	0.0204
ENSG00000130511.11	SSBP4	-3.8866	0.000101656	0.0214737
ENSG00000155755.14	TMEM237	3.87234	0.000107796	0.0223974
ENSG00000261052.1	SULT1A3	-3.80535	0.000141605	0.0289475
ENSG00000183657.2	PP13439	-3.796	0.000147047	0.0295829
ENSG00000145362.12	ANK2	3.79288	0.000148907	0.029489
ENSG00000188042.5	ARL4C	3.75462	0.000173604	0.033851
ENSG00000178075.15	GRAMD1C	-3.75453	0.000173665	0.0333498
ENSG00000243896.3	OR2A7	3.74401	0.000181109	0.0342602
ENSG00000100889.7	PCK2	3.74088	0.00018338	0.0341797
ENSG00000139546.6	TARBP2	-3.72026	0.000199021	0.0365572
ENSG00000148200.12	NR6A1	-3.7065	0.000210142	0.0380487
ENSG00000103253.13	HAGHL	3.67482	0.000238017	0.0424888
ENSG00000091664.7	SLC17A6	-3.65769	0.000254495	0.0447993
ENSG00000196208.9	GREB1	-3.65588	0.000256301	0.0444992
ENSG00000143033.13	MTF2	-3.6484	0.000263877	0.0451955
