# Supplementary material for: Hippocampal transcriptome-wide association study and neurobiological pathway analysis for Alzheimer’s disease
Source: PLOS journal article supplement (doi:10.1371/journal.pgen.1009363), 2021-02-25

# AD TWAS IGAP

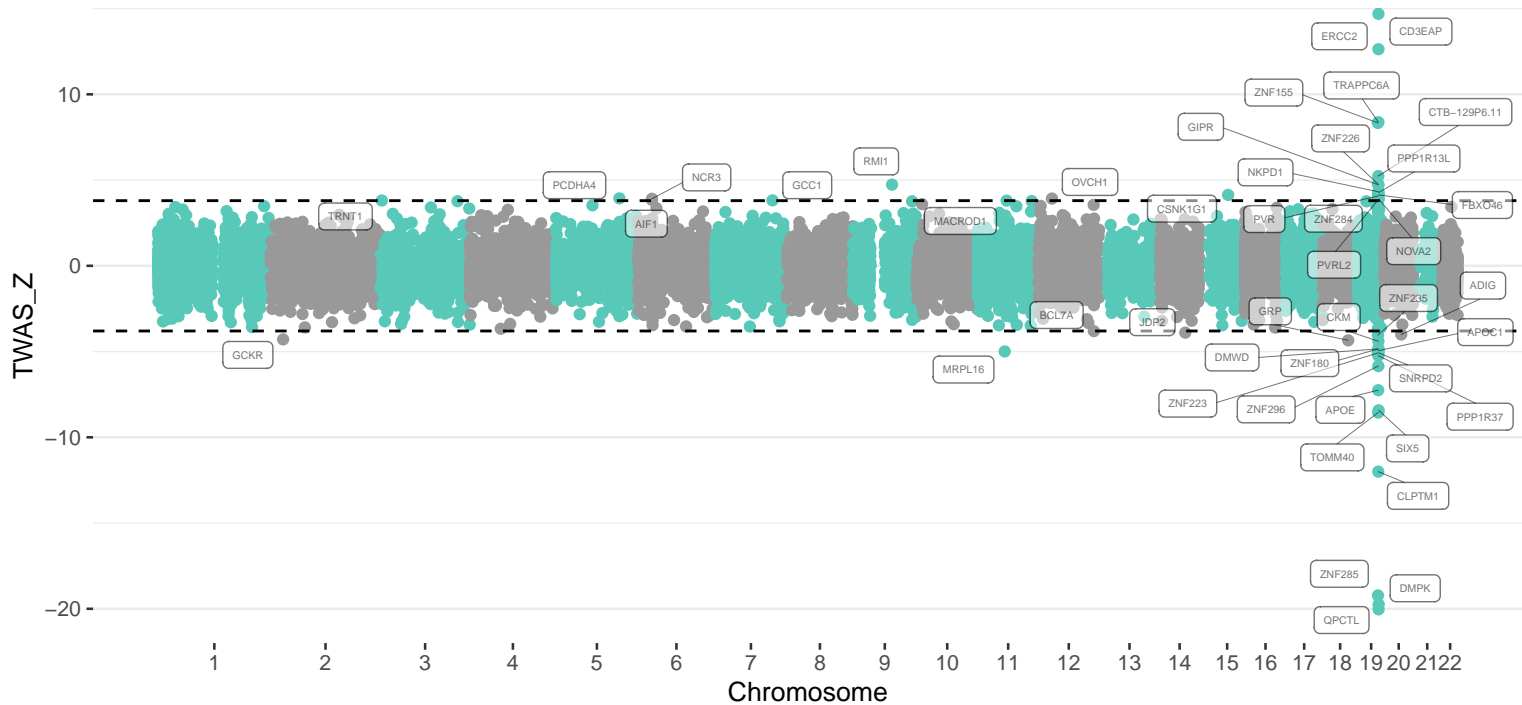

Supplement: S17 (10.1371/journal.pgen.1009363.s017) [file journal.pgen.1009363.s017]
